# Supplementary material for: Similarity thresholds used in DNA sequence assembly from short reads can reduce the comparability of population histories across species
Source: PubMed Central journal article supplement (PMC4411482; doi:10.7717/peerj.895), 2015-04-21
Supplement: peerj-03-895-s001.pdf [file peerj-03-895-s001.pdf]

Total Bases in Alignments

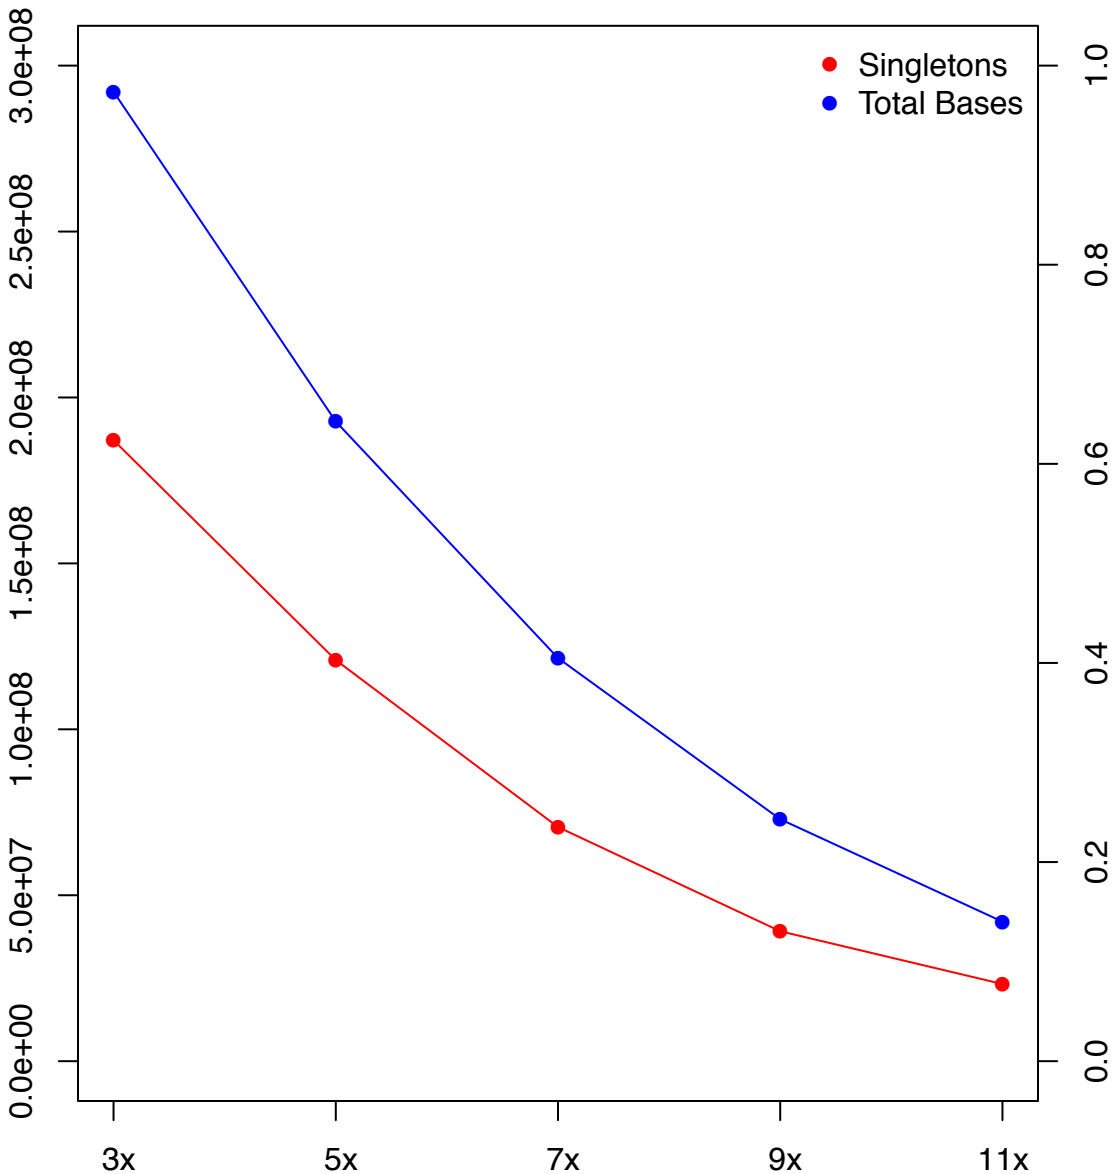

Minimum Read Depth

• Singletons  
• Total Bases

Number of Singletons/Locus
